# Supplementary material
Source: Springer Nature journal article supplement (https://www.springermedizin.de/resource/supplementary/12913_2012_2251_MOESM8_ESM.pdf/9530064)

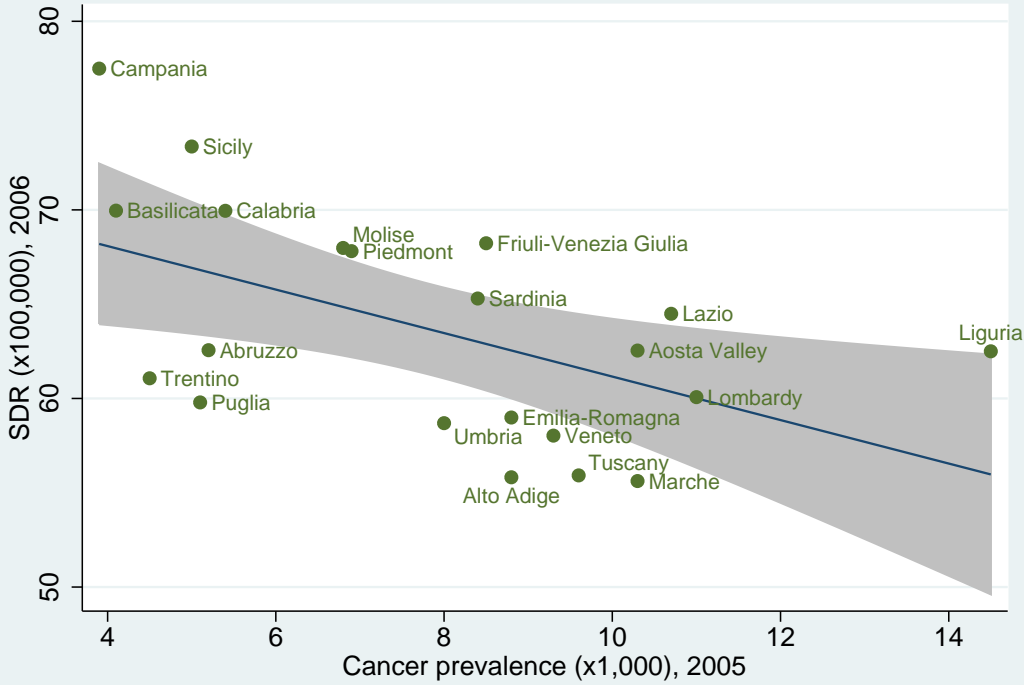

r(p-value)=-0.5299(0.0135)

Supplement: MOESM8 [file 9530064]
